# Supplementary material for: Dietary habits among men and women in West Greenland: follow-up on the ACCEPT birth cohort
Source: Springer Nature journal article supplement (doi:10.1186/s12889-021-11359-7), 2021-07-19
Supplement: MOESM3 [file 19373432]

## **Additional file 3**

**Dietary habits among men and women in West Greenland: follow-up on the ACCEPT birth cohort**

### Age group differences in traditional and imported food intake (time(s) per month) stratified by gender

Table S3A: Traditional and imported food intake (time(s) per month) by age for the mothers (N=101)

|                          | <34.0 years (n=50) |               |                   | ≥34.0 years (n=51) |               |                   | p-value       |
|--------------------------|--------------------|---------------|-------------------|--------------------|---------------|-------------------|---------------|
|                          | n (%)              | Mean (SD)     | Median (P25-P75)  | n (%)              | Mean (SD)     | Median (P25-P75)  |               |
| <b>Traditional foods</b> |                    |               | 12 % <sup>a</sup> |                    |               | 15 % <sup>a</sup> |               |
| Marine mammals           | 39 (78%)           | 7.70 (8.68)   | 5.5 (2.5-8.0)     | 37 (73%)           | 10.71 (12.01) | 6.5 (4.5-11.0)    | 0.197         |
| Seabirds                 | 44 (88%)           | 0.75 (0.87)   | 0.5 (0.0-1.0)     | 45 (88%)           | 1.04 (1.45)   | 1.0 (0.0-1.5)     | 0.297         |
| Greenlandic fish         | 46 (92%)           | 4.71 (3.82)   | 4.0 (2.0-5.5)     | 47 (92%)           | 7.82 (8.14)   | 6.0 (3.5-9.0)     | <b>0.010*</b> |
| Shellfish                | 49 (98%)           | 2.28 (1.78)   | 2.0 (1.0-3.5)     | 49 (96%)           | 2.93 (3.12)   | 2.0 (1.0-3.5)     | 0.475         |
| Dried fish               | 48 (96%)           | 3.08 (2.79)   | 2.5 (1.5-4.3)     | 48 (94%)           | 5.42 (9.47)   | 2.5 (1.5-5.4)     | 0.337         |
| Terrestrial animals      | 47 (94%)           | 4.56 (4.67)   | 3.5 (2.0-5.5)     | 47 (92%)           | 5.06 (5.78)   | 3.5 (2.0-5.5)     | 0.888         |
| Berries                  | 47 (94%)           | 3.17 (5.57)   | 1.0 (0.5-2.5)     | 48 (94%)           | 1.63 (2.15)   | 1.0 (0.5-1.8)     | 0.514         |
| <b>Imported food</b>     |                    |               | 88 % <sup>a</sup> |                    |               | 85 % <sup>a</sup> |               |
| Meat products            | 47 (94%)           | 20.28 (9.90)  | 21.6 (10.3-29.5)  | 50 (98%)           | 18.15 (15.23) | 13.9 (8.5-23.1)   | 0.066         |
| Carbohydrate foods       | 48 (96%)           | 37.98 (19.17) | 39.0 (27.8-39.0)  | 50 (98%)           | 36.24 (23.63) | 39.0 (21.6-39.0)  | 0.587         |
| Sauce                    | 49 (98%)           | 16.36 (10.70) | 13.0 (13.0-30.4)  | 51 (100%)          | 14.68 (10.76) | 13.0 (4.3-30.4)   | 0.398         |
| Vegetables               | 50 (100%)          | 18.24 (12.34) | 13.0 (13.0-30.4)  | 51 (100%)          | 18.95 (12.55) | 13.0 (13.0-30.4)  | 0.785         |
| Fruits                   | 49 (98%)           | 22.83 (19.27) | 16.0 (5.3-32.4)   | 50 (98%)           | 25.54 (16.88) | 17.9 (14.0-33.4)  | 0.228         |
| Fast food                | 49 (98%)           | 4.81 (4.84)   | 3.0 (2.0-6.0)     | 49 (96%)           | 4.81 (6.09)   | 2.5 (1.5-6.0)     | 0.342         |
| Sweets and Snacks        | 48 (96%)           | 37.25 (26.18) | 29.7 (18.3-50.3)  | 49 (96%)           | 31.92 (17.36) | 32.9(17.3-43.2)   | 0.547         |

Differences between age groups were tested with a Mann Whitney U test. Bold numbers and \* indicate significant difference (p≤0.05). n (%): number of participants with information and percentages of the total number of participant in the group (N); SD: Standard Deviation; P25-P75: 25 percentile – 75 percentile; <sup>a</sup>The overall percentages of median intake of the main food groups, traditional (x) or imported food (y), were calculated by summing the medians of the main food groups and then the sum was divided by the total median intake (x+y).

Table S3B: Traditional and imported food intake (time(s) per month) by age for the fathers (N=76)

|                          | <36.7 years (n=38) |               |                   | ≥36.7 years (n=38) |               |                   | p-value       |
|--------------------------|--------------------|---------------|-------------------|--------------------|---------------|-------------------|---------------|
|                          | n (%)              | Mean (SD)     | Median (P25-P75)  | n (%)              | Mean (SD)     | Median (P25-P75)  |               |
| <b>Traditional foods</b> |                    |               | 15 % <sup>a</sup> |                    |               | 16 % <sup>a</sup> |               |
| Marine mammals           | 25 (66%)           | 10.06 (13.48) | 6.0 (2.5-9.0)     | 25 (66%)           | 8.02 (7.46)   | 5.5 (2.0-10.5)    | 0.801         |
| Seabirds                 | 33 (87%)           | 1.03 (1.02)   | 1.0 (0.5-1.5)     | 31 (82%)           | 0.98 (0.72)   | 1.0 (0.5-1.5)     | 0.767         |
| Greenlandic fish         | 33 (87%)           | 5.62 (5.02)   | 4.5 (3.0-6.8)     | 34 (90%)           | 5.92 (3.92)   | 4.5 (3.5-7.5)     | 0.567         |
| Shellfish                | 36 (95%)           | 3.13 (3.16)   | 2.5 (1.0-3.8)     | 36 (95%)           | 3.77 (5.04)   | 2.3 (1.5-4.3)     | 0.486         |
| Dried fish               | 35 (92%)           | 4.06 (5.05)   | 2.5 (1.5-4.5)     | 37 (97%)           | 3.22 (2.15)   | 2.5 (1.5-4.5)     | 0.919         |
| Terrestrial animals      | 33 (87%)           | 6.68 (8.99)   | 3.5 (2.5-6.0)     | 33 (87%)           | 7.80 (11.67)  | 4.5 (2.5-7.0)     | 0.733         |
| Berries                  | 34 (90%)           | 1.48 (2.37)   | 0.5 (0.5-1.0)     | 34 (90%)           | 1.86 (3.07)   | 0.8 (0.5-2.5)     | 0.651         |
| <b>Imported food</b>     |                    |               | 85 % <sup>a</sup> |                    |               | 84 % <sup>a</sup> |               |
| Meat products            | 36 (95%)           | 18.07 (9.21)  | 17.3 (9.8-27.0)   | 37 (97%)           | 17.78 (12.64) | 12.1 (8.0-30.8)   | 0.612         |
| Carbohydrate foods       | 38 (100%)          | 34.74 (19.95) | 37.2 (19.8-39.0)  | 37 (97%)           | 36.68 (26.59) | 30.3 (26.5-39.0)  | 0.868         |
| Sauce                    | 38 (100%)          | 17.49 (11.80) | 13.0 (4.3-30.4)   | 38 (100%)          | 18.17 (13.74) | 13.0 (4.3-30.4)   | 0.970         |
| Vegetables               | 38 (100%)          | 11.43 (11.05) | 13.0 (2.5-13.0)   | 38 (100%)          | 14.25 (11.81) | 13.0 (4.3-13.0)   | 0.205         |
| Fruits                   | 37 (97%)           | 9.66 (10.08)  | 5.8 (2.5-14.0)    | 36 (95%)           | 19.35 (17.77) | 14.3 (5.3-32.9)   | <b>0.015*</b> |
| Fast food                | 35 (92%)           | 8.13 (8.8)    | 5.5 (2.5-9.1)     | 38 (100%)          | 5.09 (3.63)   | 4.4 (2.0-7.5)     | 0.147         |
| Sweets and Snacks        | 37 (97%)           | 32.46 (26.24) | 22.3 (10.5-52.6)  | 36 (95%)           | 33.12 (29.77) | 23.5 (12.3-48.1)  | 0.952         |

Differences between age groups were tested with a Mann Whitney U test. Bold numbers and \* indicate significant difference ( $p \leq 0.05$ ). n (%): number of participants with information and percentages of the total number of participant in the group (N); SD: Standard Deviation, P25-P75: 25 percentile – 75 percentile; <sup>a</sup>The overall percentages of median intake of the main food groups, traditional (x) or imported food (y), were calculated by summing the medians of the main food groups and then the sum was divided by the total median intake (x+y).
