# Supplementary material for: Dietary habits among men and women in West Greenland: follow-up on the ACCEPT birth cohort
Source: BMC Public Health. 2021 Jul 19;21:1426. doi: 10.1186/s12889-021-11359-7 (PMC8290613; doi:10.1186/s12889-021-11359-7)
Supplement: Supplementary file 2 — Additional file 2. [file 12889_2021_11359_MOESM2_ESM.pdf]

## **Additional file 2**

**Dietary habits among men and women in West Greenland: follow-up on the ACCEPT birth cohort**

## Intake of food groups and food items for mothers and fathers

Table S2A: Traditional and imported food intake (time(s) a month) for mothers and fathers (N=177)

|                         | n (%)      | Mean (SD)     | Median (P25-P75)  | Min-Max   | Intake once a week or more n (%) |
|-------------------------|------------|---------------|-------------------|-----------|----------------------------------|
| <b>Traditional food</b> |            |               | 14 % <sup>a</sup> |           |                                  |
| Marine mammals          | 126 (71%)  | 9.12 (10.57)  | 6.0 (3.0-9.5)     | 0.0-54.4  | 83 (65.9%)                       |
| Seabirds                | 153 (86%)  | 0.94 (1.08)   | 1.0 (0.0-1.5)     | 0.0-9.1   | 3 (2.0%)                         |
| Greenlandic fish        | 160 (90%)  | 6.07 (5.75)   | 4.5 (3.0-7.5)     | 0.0-45.5  | 84 (52.5%)                       |
| Shellfish               | 170 (96%)  | 2.96 (3.36)   | 2.0 (1.0-3.5)     | 0.0-30.4  | 32 (18.8%)                       |
| Dried fish              | 168 (95%)  | 3.98 (5.88)   | 2.5 (1.5-4.5)     | 0.0-62.8  | 47 (28.0%)                       |
| Terrestrial animals     | 160 (90%)  | 5.81 (7.83)   | 3.5 (2.0-6.0)     | 0.0-61.3  | 63 (39.4%)                       |
| Berries                 | 163 (92%)  | 2.09 (3.70)   | 1.0 (0.5-2.5)     | 0.0-30.4  | 27 (16.6%)                       |
| <b>Imported food</b>    |            |               | 86 % <sup>a</sup> |           |                                  |
| Meat products           | 170 (96%)  | 18.64 (12.11) | 15.3 (8.8-27.0)   | 2.0-92.2  | 165 (97.1%)                      |
| Carbohydrate foods      | 173 (98%)  | 36.49 (22.24) | 39.0 (21.6-39.0)  | 0.0-136.8 | 169 (97.7%)                      |
| Sauce                   | 176 (99%)  | 16.51 (11.64) | 13.0 (4.3-30.4)   | 0.0-45.6  | 148 (84.1%)                      |
| Vegetables              | 177 (100%) | 16.13 (12.30) | 13.0 (4.3-30.4)   | 0.0-45.6  | 148 (83.6%)                      |
| Fruits                  | 172 (97%)  | 20.06 (17.50) | 14.5 (5.3-31.9)   | 0.0-78.5  | 144 (83.7%)                      |
| Fast food               | 171 (97%)  | 5.55 (6.10)   | 4.0 (2.0-6.3)     | 0.0-47.1  | 81 (47.4%)                       |
| Sweets and Snacks       | 170 (96%)  | 33.80 (24.73) | 28.5 (15.0-46.8)  | 1.5-153.5 | 167 (98.2%)                      |

n (%): number of participants with information and percentages of the total number of participant (N); SD: Standard Deviation, P25-P75: 25 percentile – 75 percentile; <sup>a</sup> The overall percentages of median intake of the main food groups, traditional (x) or imported food (y), were calculated by summing the medians of the main food groups and then the sum was divided by the total median intake (x+y).

Table S2B: Intake of traditional and imported food items (time(s) a month) and seasonal information for mothers and fathers together (N=177)

|                               | n (%)     | Mean (SD)   | Median (P25-P75) | Intake once a week or more n (%) | Spring/ Summer <sup>a</sup> | Autumn/ Winter <sup>a</sup> | Missing information on season <sup>b</sup> |
|-------------------------------|-----------|-------------|------------------|----------------------------------|-----------------------------|-----------------------------|--------------------------------------------|
| <b>Traditional food items</b> |           |             |                  |                                  |                             |                             |                                            |
| Hooded seal                   | 154 (87%) | 0.27 (0.69) | 0.0 (0.0-0.5)    | 3 (1.9%)                         | 16 (84.2%)                  | 9 (47.4%)                   | 49 (28%)                                   |
| Other seal                    | 163 (92%) | 1.30 (2.33) | 0.5 (0.5-1.0)    | 13 (8.0%)                        | 51 (85.0%)                  | 51 (85.0%)                  | 88 (50%)                                   |
| Minke whale                   | 159 (90%) | 0.52 (0.62) | 0.5 (0.0-0.5)    | 1 (0.6%)                         | 45 (91.8%)                  | 37 (75.5%)                  | 76 (43%)                                   |
| Fin whale                     | 162 (92%) | 0.37 (0.64) | 0.0 (0.0-0.5)    | 2 (1.2%)                         | 28 (84.8%)                  | 22 (66.7%)                  | 59 (33%)                                   |

|                                           |            |             |               |            |            |             |          |
|-------------------------------------------|------------|-------------|---------------|------------|------------|-------------|----------|
| Beluga whale                              | 167 (94%)  | 0.64 (1.23) | 0.5 (0.0-0.5) | 2 (1.2%)   | 37 (74.0%) | 45 (90.0%)  | 65 (37%) |
| Narwhale                                  | 169 (96%)  | 0.53 (0.68) | 0.5 (0.0-0.5) | 1 (0.6%)   | 37 (75.5%) | 47 (95.9%)  | 70 (40%) |
| Porpoise/Grind                            | 165 (93%)  | 0.50 (2.01) | 0.0 (0.0-0.5) | 4 (2.4%)   | 19 (86.4%) | 13 (59.1%)  | 47 (27%) |
| Dried meat from narwhale and Beluga whale | 172 (97%)  | 0.61 (1.51) | 0.5 (0.0-0.5) | 3 (1.7%)   | 36 (85.7%) | 35 (83.3%)  | 59 (33%) |
| Dried meat from seal                      | 170 (96%)  | 0.42 (1.15) | 0.0 (0.0-0.5) | 2 (1.2%)   | 29 (82.9%) | 30 (85.7%)  | 46 (26%) |
| Dried meat from fin- and minke whale      | 173 (98%)  | 0.47 (0.80) | 0.5 (0.0-0.5) | 4 (2.3%)   | 31 (91.2%) | 29 (85.3%)  | 59 (33%) |
| Seal blubber                              | 173 (98%)  | 1.07 (2.11) | 0.5 (0.0-1.0) | 11 (6.4%)  | 45 (97.8%) | 39 (84.8%)  | 77 (44%) |
| Whale blubber                             | 169 (96%)  | 0.47 (0.79) | 0.0 (0.0-0.5) | 3 (1.8%)   | 27 (93.1%) | 24 (82.8%)  | 62 (35%) |
| Narwhale blubber and mattak               | 169 (96%)  | 1.32 (2.65) | 0.5 (0.5-1.0) | 10 (5.9%)  | 63 (86.3%) | 70 (95.9%)  | 86 (49%) |
| Suaatsat with seal or whale               | 169 (96%)  | 1.24 (1.89) | 0.5 (0.5-1.0) | 11 (6.5%)  | 58 (90.6%) | 59 (92.2%)  | 96 (54%) |
| Walrus                                    | 166 (94%)  | 0.10 (0.28) | 0.0 (0.0-0.0) | 0 (0.0%)   | 9 (69.2%)  | 8 (61.5%)   | 26 (15%) |
| Polar bear                                | 169 (96%)  | 0.03 (0.11) | 0.0 (0.0-0.0) | 0 (0.0%)   | 2 (100.0%) | 2 (100.0%)  | 15 (8%)  |
| Guillemot                                 | 163 (92%)  | 0.47 (0.59) | 0.5 (0.0-0.5) | 2 (1.2%)   | 18 (28.6%) | 60 (95.2%)  | 62 (35%) |
| Common eider                              | 168 (95%)  | 0.34 (0.60) | 0.0 (0.0-0.5) | 2 (1.2%)   | 15 (39.5%) | 36 (94.7%)  | 52 (29%) |
| Kittiwake                                 | 162 (92%)  | 0.14 (0.31) | 0.0 (0.0-0.0) | 0 (0.0%)   | 10 (50.0%) | 14 (70.0%)  | 33 (19%) |
| Other seabirds                            | 176 (99%)  | 0.05 (0.22) | 0.0 (0.0-0.0) | 0 (0.0%)   | 1 (20.0%)  | 5 (100.0%)  | 8 (5%)   |
| Trout                                     | 168 (95%)  | 1.22 (1.83) | 0.5 (0.5-1.0) | 7 (4.2%)   | 79 (90.8%) | 44 (50.6%)  | 77 (44%) |
| Cod                                       | 174 (98%)  | 1.24 (1.58) | 0.5 (0.5-1.0) | 6 (3.4%)   | 69 (97.2%) | 61 (86.9%)  | 94 (53%) |
| Greenlandic halibut                       | 175 (99%)  | 0.93 (0.93) | 0.5 (0.5-1.0) | 6 (3.4%)   | 62 (89.9%) | 68 (98.6%)  | 88 (50%) |
| Atlantic halibut                          | 171 (97%)  | 0.36 (0.58) | 0.5 (0.0-0.5) | 1 (0.6%)   | 27 (87.1%) | 28 (90.3%)  | 61 (34%) |
| Redfish                                   | 173 (98%)  | 0.39 (0.54) | 0.5 (0.0-0.5) | 1 (0.6%)   | 38 (90.5%) | 34 (81.0%)  | 60 (34%) |
| Salmon                                    | 173 (98%)  | 0.92 (1.55) | 0.5 (0.5-1.0) | 5 (2.9%)   | 54 (85.7%) | 57 (90.5%)  | 83 (47%) |
| Wolfish                                   | 172 (97%)  | 0.32 (0.43) | 0.0 (0.0-0.5) | 0 (0.0%)   | 27 (87.1%) | 24 (77.4%)  | 59 (33%) |
| Capelin                                   | 171 (97%)  | 0.69 (0.90) | 0.5 (0.0-0.5) | 4 (2.3%)   | 60 (96.8%) | 37 (59.7%)  | 69 (39%) |
| Shrimp                                    | 176 (99%)  | 1.98 (4.37) | 1.0 (0.5-2.5) | 13 (7.4%)  | 71 (97.3%) | 72 (98.6%)  | 93 (53%) |
| Clamp                                     | 172 (97%)  | 0.54 (0.70) | 0.5 (0.0-0.5) | 2 (1.2%)   | 43 (95.6%) | 36 (80.0%)  | 69 (39%) |
| Crab                                      | 175 (99%)  | 0.75 (0.79) | 0.5 (0.5-1.0) | 2 (1.2%)   | 52 (89.7%) | 56 (96.6%)  | 87 (49%) |
| Dried Greenlandic halibut                 | 174 (98%)  | 0.63 (0.61) | 0.5 (0.5-0.5) | 1 (0.6%)   | 48 (87.3%) | 55 (100.0%) | 96 (54%) |
| Dried capelin                             | 173 (98%)  | 0.93 (1.57) | 0.5 (0.5-1.0) | 4 (2.3%)   | 52 (98.1%) | 47 (88.7%)  | 84 (47%) |
| Dried cod                                 | 176 (99%)  | 1.97 (3.8)  | 1.0 (0.5-2.5) | 18 (10.2%) | 62 (92.5%) | 65 (97.0%)  | 93 (53%) |
| Dried wolfish                             | 172 (97%)  | 0.43 (2.34) | 0.0 (0.0-0.5) | 1 (0.6%)   | 20 (95.2%) | 20 (95.2%)  | 47 (27%) |
| Dried other fish                          | 177 (100%) | 0.14 (0.45) | 0.0 (0.0-0.0) | 1 (0.6%)   | 5 (71.4%)  | 6 (85.7%)   | 24 (14%) |
| Grouse                                    | 169 (96%)  | 0.20 (0.42) | 0.0 (0.0-0.5) | 0 (0.0%)   | 12 (42.9%) | 25 (89.3%)  | 29 (16%) |

|                            |            |               |                 |             |             |             |           |
|----------------------------|------------|---------------|-----------------|-------------|-------------|-------------|-----------|
| Greenlandic Lamb/Sheep     | 175 (99%)  | 1.57 (3.01)   | 1.0 (0.5-1.0)   | 13 (7.4%)   | 56 (96.6%)  | 57 (98.3%)  | 100 (56%) |
| Caribou                    | 172 (97%)  | 2.75 (4.15)   | 2.5 (1.0-2.5)   | 25 (14.5%)  | 72 (87.8%)  | 77 (93.9%)  | 92 (52%)  |
| Musk ox                    | 174 (98%)  | 1.07 (2.72)   | 0.5 (0.5-1.0)   | 6 (3.4%)    | 51 (86.4%)  | 54 (91.5%)  | 78 (44%)  |
| Hare                       | 171 (97%)  | 0.13 (0.39)   | 0.0 (0.0-0.0)   | 1 (0.6%)    | 11 (64.7%)  | 15 (88.2%)  | 22 (12%)  |
| Berries                    | 163 (92%)  | 2.09 (3.70)   | 1.0 (0.5-2.5)   | 27 (16.6%)  | 65 (85.5%)  | 55 (72.4%)  | 89 (50%)  |
| <b>Imported food items</b> |            |               |                 |             |             |             |           |
| Chicken/Turkey             | 177 (100%) | 3.74 (3.92)   | 2.5 (1.0-4.3)   | 73 (41.2%)  | 72 (100.0%) | 72 (100.0%) | 103 (58%) |
| Pork                       | 176 (99%)  | 5.18 (5.46)   | 2.5 (2.5-4.3)   | 87 (49.4%)  | 73 (100.0%) | 72 (98.6%)  | 101 (56%) |
| Beef                       | 177 (100%) | 7.61 (5.77)   | 4.3 (2.5-13)    | 123 (69.5%) | 71 (100.0%) | 71 (100.0%) | 105 (59%) |
| Imported Lamb/Sheep        | 174 (98%)  | 1.06 (1.68)   | 0.5 (0.5-1.0)   | 11 (6.3%)   | 53 (96.4%)  | 55 (100.0%) | 83 (47%)  |
| Imported fish              | 172 (97%)  | 1.08 (2.38)   | 0.5 (0.0-0.8)   | 17 (9.9%)   | 42 (97.7%)  | 41 (95.3%)  | 56 (32%)  |
| Potato                     | 176 (99%)  | 14.21 (10.17) | 13.0 (4.3-13.0) | 152 (86.4%) | 68 (100.0%) | 68 (100.0%) | 107 (60%) |
| Pasta                      | 176 (99%)  | 10.89 (8.40)  | 13.0 (4.3-13.0) | 145 (82.4%) | 69 (100.0%) | 69 (100.0%) | 107 (60%) |
| Rice                       | 175 (99%)  | 11.19 (8.32)  | 13.0 (4.3-13.0) | 145 (82.9%) | 69 (100.0%) | 69 (100.0%) | 107 (60%) |
| Sauce                      | 176 (99%)  | 16.51 (11.64) | 13.0 (4.3-30.4) | 148 (84.1%) | 69 (100.0%) | 69 (100.0%) | 106 (60%) |
| Vegetables                 | 177 (100%) | 16.13 (12.30) | 13.0 (4.3-30.4) | 148 (83.6%) | 68 (100.0%) | 68 (100.0%) | 105 (59%) |
| Fresh fruit                | 176 (99%)  | 15.45 (13.92) | 13.0 (4.3-30.4) | 140 (79.5%) | 68 (100.0%) | 68 (100.0%) | 106 (60%) |
| Canned fruit               | 173 (98%)  | 1.02 (1.64)   | 0.5 (0.5-1.0)   | 10 (5.8%)   | 55 (96.5%)  | 57 (100.0%) | 92 (52%)  |
| Frozen fruit               | 175 (99%)  | 3.55 (7.04)   | 1.0 (0.5-2.5)   | 36 (20.6%)  | 54 (100.0%) | 54 (100.0%) | 95 (54%)  |
| Dried fruit                | 175 (99%)  | 3.54 (7.53)   | 1.0 (0.5-2.5)   | 33 (18.9%)  | 58 (100.0%) | 58 (100.0%) | 92 (52%)  |
| Pizza                      | 176 (99%)  | 1.89 (3.64)   | 1.0 (0.5-2.5)   | 21 (11.9%)  | 71 (98.6%)  | 69 (95.8%)  | 97 (55%)  |
| Ready-made meals           | 172 (97%)  | 1.35 (2.09)   | 0.5 (0.5-1.8)   | 11 (6.4%)   | 54 (100.0%) | 54 (100.0%) | 97 (55%)  |
| Fast food and café-food    | 177 (100%) | 2.26 (3.53)   | 1.0 (0.5-2.5)   | 28 (15.8%)  | 67 (100.0%) | 67 (100.0%) | 101 (57%) |
| Nuts                       | 176 (99%)  | 5.02 (8.59)   | 2.5 (0.5-4.3)   | 53 (30.1%)  | 65 (100.0%) | 65 (100.0%) | 100 (56%) |
| Cake                       | 176 (99%)  | 4.27 (6.30)   | 2.5 (1.0-4.3)   | 66 (37.5%)  | 66 (100.0%) | 66 (100.0%) | 109 (62%) |
| Milk chocolate             | 176 (99%)  | 4.44 (6.85)   | 2.5 (0.5-4.3)   | 62 (35.2%)  | 63 (100.0%) | 63 (100.0%) | 95 (54%)  |
| Dark chocolate             | 177 (100%) | 3.09 (5.97)   | 1.0 (0.5-4.3)   | 48 (27.1%)  | 56 (100.0%) | 56 (100.0%) | 91 (51%)  |
| Candy                      | 175 (99%)  | 7.72 (9.68)   | 4.3 (1.0-13.0)  | 94 (53.7%)  | 67 (100.0%) | 67 (100.0%) | 105 (59%) |
| Chips                      | 174 (98%)  | 7.24 (8.70)   | 4.3 (2.5-13.0)  | 110 (63.2%) | 67 (100.0%) | 67 (100.0%) | 110 (62%) |

n (%): number of participants with information and percentages of the total number of participant (N); SD: Standard Deviation, P25-P75: 25 percentile – 75 percentile; <sup>a</sup> Number of participant reporting eating the food item season (Spring/Summer or Autumn/Winter), percentage in calculated based on the participants who gave seasonal information on the specific food item; <sup>b</sup> Missing information is calculated based on those who reported eating the food item, thus participants reporting never eating the food items is excluded from the calculations.
